# Supplementary material for: Differentially expressed alternatively spliced genes in Malignant Pleural Mesothelioma identified using massively parallel transcriptome sequencing
Source: BMC Med Genet. 2009 Dec 31;10:149. doi: 10.1186/1471-2350-10-149 (PMC2808307; doi:10.1186/1471-2350-10-149)
Supplement: Additional file 1 — PCR Primers used to quantify expression levels of candidate exon junctions [file 1471-2350-10-149-S1.DOC]

**Additional file 1, PCR Primers used to quantify expression levels of candidate exon junctions**

| **Genea** | **Aceview Exon Junction Identifierb** | **NCBI Accession #** | **Forward Primer Sequence**  **(5’-3’)** | **Reverse Primer Sequence**  **(5’-3’)** | **Forward Primer Location (Aceview/NCBI)c** | **Reverse Primer Location (Aceview/NCBI)c** | **Location of Exon Junction**  **(NCBI)** | **PCR Amplicon Size** |
| --- | --- | --- | --- | --- | --- | --- | --- | --- |
| ACTG2 | ACTG2.aAug05.574 | NM_001615.3 | TTCAATGTCCCTGCCATGTA | GCAGGGCATAGCCTTCATAG | 504/504 | 639/639 | 574 | 136 |
| ACTG2 | ACTG2.aAug05.CS | NM_001615.3 | TTGCTGACAGGATGCAGAAG | TGGAGAGAGAGGCCAGGATA | 1051/1051 | 1176/1176 |  | 126 |
| CDK4 | CDK4.aAug05.1246 | NM_000075.2 | CCCGAAGTTCTTCTGCAGTC | CTGGTCGGCTTCAGAGTTTC | 1160/774 | 1279/893 | 860 | 120 |
| CDK4 | CDK4.aAug05.CS | NM_000075.2 | GGCCCTCAAGAGTGTGAGAG | ACATTGGGATGCTCAAAAGC | 709/323 | 825/439 |  | 117 |
| C1QC | C1QAandC1QG.aAug05.1449 | NM_172369.2 | TCTGCATCCTTGCCTAGACC | AAGTGTCCCAGGAACCACAC | 1422/889 | 1575/1042 | 916 | 154 |
| C1QC | C1QAandC1QG.aAug05.CS | NM_172369.2 | GTGTGGTTCCTGGGACACTT | TATATCTCCCCACCCCTTCC | 1539/1023 | 1629/1113 |  | 91 |
| CYFIP1 | CYFIP1.fAug05.49 | NM_014608.2 | CGCAGAACAGGGGTCCTTA | CTGGTAGAGCAGCGAGGATG | 44/NA | 198/NA | NA | 155 |
| CYFIP1 | CYFIP1.fAug05.CS | NM_014608.2 | GGATGTATTTGACGCCCAGT | GACACTCCCATCCATCAGGT | 836/859 | 915/938 |  | 80 |
| EMP2 | EMP2.shed3.aAug05.1003 | NM_001424.4 | GACCCATCCACCATTCATTC | ATAGAAGGCCAGACGCAGTG | 927/1801 | 1030/3960 | NA | 104**d** |
| EMP2 | EMP2.shed3.aAug05.CS | NM_001424.4 | CGTCGGGGCTACATGAGTAT | GATGTGGGCACTGAATGTTG | 1123/4053 | 1223/4153 |  | 101 |
| MRPL51 | MRPL51.bAug05.542 | NM_016497.2 | AGAAATGGCAGGGAACCTCT | TCCAACGATCAACCACTTTG | 459/152 | 604/297 | 235 | 146 |
| MRPL51 | MRPL51.bAug05.CS | NM_016497.2 | CAAAGTGGTTGATCGTTGGA | CGTTGCAATTCATTCCCTTT | 585/278 | 731/424 |  | 147 |
| TXNRD1 | TXNRD1.aAug05.1333 | NM_001093771.1 | GAACAAATTGAAGCAGGGACA | TCTTGTGCAAGCATCTCTTCC | 1243/1241 | 1368/1366 | 1331 | 126 |
| TXNRD1 | TXNRD1.aAug05.CS | NM_001093771.1 | AGCATCCTATGTCGCTTTGG | TGCCATGTTCTTCCATGTGT | 1065/1063 | 1207/1205 |  | 143 |
| hfl-B5 | hfl-B5.aAug05.1123 | NM_006360.3 | TTGACACAATGCAGCAAGAA | TCCGATGTGTGCTATGACTGA | 999/924 | 1139/1064 | 1048 | 141 |
| hfl-B5 | hfl-B5.aAug05.CS | NM_006360.3 | TGATGCCCACAGGTGTATTG | CATGAATAAGCTCGCCTTCC | 724/649 | 833/758 |  | 110 |
| DNAJB11 | DNAJB11.aAug05.1612 | NM_016306.4 | GAGAGACGGCATGGAGTACC | TGGGTGCTTGACAACTTTGA | 1577/868 | 1676/967 | 903 | 100 |
| DNAJB11 | DNAJB11.aAug05.CS | NM_016306.4 | TGCAGGAAATTTTGTGGAAG | AGACCACCTCCTGGGTCATT | 1367/658 | 1506/797 |  | 140 |
| COL3A1 | COL3A1.aAug05.1680 | NM_000090.3 | ATGGCATCCCAGGAGAAAAG | GTTCTCCAGCAGCTCCTCTG | 1660/1607 | 1740/1687 | 1627 | 81 |
| COL3A1 | COL3A1.aAug05.CS | NM_000090.3 | GGTGCTAAGGGTGAAGTTGG | CGCCTTTACCACCAGGACTA | 1212/1159 | 1359/1306 |  | 148 |

aNCBI Entrez gene symbol

bNomenclature used to describe exon junctions detailed in Methods. For example, the exon junction ‘ACTG2.aAug05.574’ defines a junction that occurs in the ACTG2 gene in Aceview transcript ‘a’ in the ‘Aug05’ database at nucleotide position 574. CS – Common sequence; used as a reference mRNA sequence for relative quantification of exon junction expression levels. See Methods.

cPrimer start location along the Aceview mRNA sequence or the NCBI sequence.

NA; Not available. The forward primer and location for this exon junction is contained within an intron in the NCBI database.

dBecause primers cover big range (2160bp) on NCBI Refseq sequence NM_001424.4, PCR does not generate PCR product due to short extension time of the PCR reaction.
