# Supplementary material for: Differentially expressed alternatively spliced genes in Malignant Pleural Mesothelioma identified using massively parallel transcriptome sequencing
Source: BMC Med Genet. 2009 Dec 31;10:149. doi: 10.1186/1471-2350-10-149 (PMC2808307; doi:10.1186/1471-2350-10-149)
Supplement: Additional file 4 — 76 highly expressed exon junction in MPM with EJEI difference > 0.1 and their mapped read numbers, EJEI, normalized EJEI and EJEI difference between MPM samples and normal lung [file 1471-2350-10-149-S4.XLS]

## Sheet: Sheet1
normal/tumor	Gene	chromosome	5' location on chromosome	3' location on chromosome	direction on chromesome	typical AceView sequence	Exon junction location in typical AceView sequence	Total exon junction read					number of reads for candidate exon junction					Exon junciton expresion index (EJEI)						normalized EJEI					normalized Meso/Normal EJEI difference
	Gene	chromosome	5' location on chromosome	3' location on chromosome	direction on chromesome	typical AceView sequence	Exon juncation location on typical AceView sequence	Meso1	Meso2	Meso3	Meso4	normal lung	Meso1	Meso2	Meso3	Meso4	normal lung	Meso1	Meso2	Meso3	Meso4	normal lung	sum	Meso1	Meso2	Meso3	Meso4	normal lung
tumor	C1QAandC1QG	1	22719685	22719703	+	C1QAandC1QG.aAug05	1449	281	116	401	145	127	63	31	93	42	0	0.224199	0.267241	0.23192	0.289655	0	1.01302	0.221319	0.263808	0.22894	0.285933	0	0.221319
tumor	MRPL51	12	6472485	6472399	-	MRPL51.bAug05	542	37	23	25	24	9	11	9	7	8	0	0.297297	0.391304	0.28	0.333333	0	1.30193	0.22835	0.300556	0.215065	0.256029	0	0.215065
tumor	TXNRD1	12	103221674	103222592	+	TXNRD1.aAug05	1333	84	132	63	398	51	8	14	11	42	0	0.0952381	0.106061	0.174603	0.105528	0	0.48143	0.197824	0.220303	0.362677	0.219196	0	0.197824
tumor	CDK4	12	56430706	56429554	-	CDK4.aAug05	1246	136	89	101	84	34	22	12	12	16	0	0.161765	0.134831	0.118812	0.190476	0	0.605884	0.266989	0.222537	0.196097	0.314377	0	0.196097
tumor	hfl-B5	11	32579944	32580401	+	hfl-B5.aAug05	1123	114	103	74	191	58	11	10	8	21	1	0.0964912	0.0970874	0.108108	0.109948	0.0172414	0.428876	0.224986	0.226376	0.252073	0.256362	0.0402013	0.184785
tumor	COL3A1	2	189685331	189685924	+	COL3A1.aAug05	1680	1308	388	1032	1793	286	12	7	10	23	0	0.00917431	0.0180412	0.00968992	0.0128277	0	0.0497331	0.184471	0.362761	0.194838	0.25793	0	0.184471
tumor	DNAJB11	3	187782568	187783207	+	DNAJB11.aAug05	1612	41	103	40	89	35	6	16	6	9	0	0.146341	0.15534	0.15	0.101124	0	0.552805	0.264725	0.281003	0.271343	0.182928	0	0.182928
tumor	UBE2M	19	63759866	63759558	-	UBE2M.aAug05	943	62	43	35	29	38	11	8	9	6	1	0.177419	0.186047	0.257143	0.206897	0.0263158	0.853821	0.207795	0.217899	0.301167	0.242318	0.0308212	0.176973
tumor	HNRPH1	5	178977596	178977539	-	HNRPH1.aAug05	1039	68	109	84	290	89	6	9	10	31	1	0.0882353	0.0825688	0.119048	0.106897	0.011236	0.407984	0.216271	0.202382	0.291795	0.262011	0.0275402	0.174842
tumor	QIL1	19	5630356	5629659	-	QIL1.aAug05	684	34	28	21	16	40	9	9	6	6	2	0.264706	0.321429	0.285714	0.375	0.05	1.29685	0.204115	0.247854	0.220314	0.289162	0.038555	0.16556
tumor	TYMS	18	649714	652146	+	TYMS.aAug05	483	57	72	74	45	55	3	3	3	5	0	0.0526316	0.0416667	0.0405405	0.111111	0	0.24595	0.213993	0.169411	0.164833	0.451763	0	0.164833
tumor	TGFBI	5	135410603	135410862	+	TGFBI.aAug05	745	495	281	115	882	111	23	13	7	58	1	0.0464646	0.0462633	0.0608696	0.0657596	0.00900901	0.228366	0.203466	0.202584	0.266544	0.287957	0.0394498	0.163134
tumor	C1QAandC1QG	1	22715513	22719026	+	C1QAandC1QG.iAug05	66	281	116	401	145	127	3	2	3	1	0	0.0106762	0.0172414	0.0074813	0.00689655	0	0.0422954	0.252419	0.407642	0.176882	0.163057	0	0.163057
tumor	ACTR3	2	114425378	114425527	+	ACTR3.aAug05	2143	56	69	105	184	57	9	10	18	26	2	0.160714	0.144928	0.171429	0.141304	0.0350877	0.653462	0.245943	0.221784	0.262339	0.216239	0.0536951	0.162544
tumor	NDUFS2	1	157996595	157996727	+	NDUFS2.bAug05	1745	108	125	97	113	60	16	13	11	18	1	0.148148	0.104	0.113402	0.159292	0.0166667	0.541509	0.273584	0.192056	0.209419	0.294163	0.0307782	0.161278
tumor	KIAA1641	2	97633780	97632113	-	KIAA1641.bAug05	1085	75	119	170	165	119	2	4	9	9	0	0.0266667	0.0336134	0.0529412	0.0545455	0	0.167767	0.158951	0.200358	0.315564	0.325127	0	0.158951
tumor	GTF2I	7	73558076	73559228	+	GTF2I.aAug05	763	165	187	149	240	317	3	2	2	6	0	0.0181818	0.0106952	0.0134228	0.025	0	0.0672998	0.270161	0.158919	0.199448	0.371472	0	0.158919
tumor	PSMD4	1	148049577	148050381	+	PSMD4.aAug05	345	142	71	94	131	73	10	8	8	10	1	0.0704225	0.112676	0.0851064	0.0763359	0.0136986	0.358239	0.196579	0.314527	0.237568	0.213086	0.0382388	0.158341
tumor	NNMT	11	113672642	113673883	+	NNMT.aAug05	419	176	164	47	361	39	58	39	14	100	2	0.329545	0.237805	0.297872	0.277008	0.0512821	1.19351	0.276114	0.199248	0.249576	0.232095	0.0429673	0.156281
tumor	TPM1	15	61140525	61141467	+	TPM1.bAug05	838	77	307	63	380	64	11	35	7	45	2	0.142857	0.114007	0.111111	0.118421	0.03125	0.517646	0.275975	0.22024	0.214647	0.228768	0.0603695	0.154278
tumor	PSMA2	7	42737514	42736245	-	PSMA2.aAug05	440	143	87	75	83	45	19	19	10	18	1	0.132867	0.218391	0.133333	0.216867	0.0222222	0.723681	0.183599	0.301778	0.184243	0.299673	0.0307072	0.152892
tumor	COX6B1	19	40834091	40837313	+	COX6B1.aAug05	372	140	103	89	98	70	28	29	19	18	3	0.2	0.281553	0.213483	0.183673	0.0428571	0.921567	0.217022	0.305516	0.231652	0.199306	0.0465046	0.152801
tumor	RAD23A	19	12920366	12920500	+	RAD23A.aAug05	582	132	102	100	70	87	13	12	7	6	1	0.0984848	0.117647	0.07	0.0857143	0.0114943	0.38334	0.256912	0.3069	0.182605	0.223598	0.0299845	0.152621
tumor	CCT5	5	10303557	10307257	+	CCT5.aAug05	277	89	79	124	147	49	3	4	4	3	0	0.0337079	0.0506329	0.0322581	0.0204082	0	0.137007	0.24603	0.369564	0.235448	0.148957	0	0.148957
tumor	RPS26	12	54722653	54723414	+	RPS26.aAug05	494	621	286	378	291	104	160	60	76	70	6	0.257649	0.20979	0.201058	0.24055	0.0576923	0.96674	0.266513	0.217008	0.207976	0.248826	0.0596772	0.148298
tumor	CCT5	5	10311415	10311498	+	CCT5.aAug05	895	89	79	124	147	49	9	7	16	18	1	0.101124	0.0886076	0.129032	0.122449	0.0204082	0.461621	0.219062	0.191949	0.27952	0.265259	0.0442098	0.147739
tumor	TYMS	18	652320	659072	+	TYMS.aAug05	658	57	72	74	45	55	7	9	6	4	1	0.122807	0.125	0.0810811	0.0888889	0.0181818	0.435959	0.281694	0.286724	0.185983	0.203893	0.0417054	0.144278
tumor	NME1	17	46593632	46594088	+	NME1.hAug05	450	660	385	403	472	167	36	25	16	33	1	0.0545455	0.0649351	0.0397022	0.0699153	0.00598802	0.235086	0.232023	0.276218	0.168884	0.297403	0.0254716	0.143412
tumor	hfl-B5	11	32574169	32578811	+	hfl-B5.aAug05	918	114	103	74	191	58	12	20	12	26	1	0.105263	0.194175	0.162162	0.136126	0.0172414	0.614967	0.171169	0.315748	0.263692	0.221354	0.0280363	0.143132
tumor	MUC1	1	151955336	151955109	-	MUC1.vmAug05	325	196	298	86	149	2353	18	20	15	19	4	0.0918367	0.0671141	0.174419	0.127517	0.00169996	0.462586	0.198529	0.145085	0.377051	0.275661	0.0036749	0.14141
tumor	RPS21	20	60396125	60396294	+	RPS21.aAug05	308	1734	1193	1780	1350	1156	122	69	92	63	15	0.0703576	0.0578374	0.0516854	0.0466667	0.0129758	0.239523	0.293741	0.241469	0.215785	0.194832	0.0541735	0.140658
tumor	HEBP2	6	138768981	138775710	+	HEBP2.aAug05	717	17	34	24	32	18	6	13	9	16	2	0.352941	0.382353	0.375	0.5	0.111111	1.72141	0.205031	0.222117	0.217845	0.29046	0.0645467	0.140484
tumor	TYMS	18	663443	663450	+	TYMS.cAug05	1287	57	72	74	45	55	11	14	26	9	3	0.192982	0.194444	0.351351	0.2	0.0545455	0.993324	0.19428	0.195751	0.353713	0.201344	0.0549121	0.139367
tumor	RNPC2	20	33756004	33755917	-	RNPC2.aAug05	1837	53	105	75	231	98	7	10	11	17	1	0.132075	0.0952381	0.146667	0.0735931	0.0102041	0.457777	0.288515	0.208045	0.320389	0.160762	0.0222905	0.138471
tumor	HNRPUL1	19	46490256	46492083	+	HNRPUL1.aAug05	2089	72	135	85	143	150	6	10	6	9	3	0.0833333	0.0740741	0.0705882	0.0629371	0.02	0.310933	0.268011	0.238232	0.227021	0.202414	0.0643226	0.138091
tumor	ASS	9	130385390	130394274	+	ASS.aAug05	1320	233	98	91	63	70	20	9	9	7	2	0.0858369	0.0918367	0.0989011	0.111111	0.0285714	0.416257	0.206211	0.220625	0.237596	0.266929	0.0686389	0.137572
tumor	EIF4G2	11	10779085	10778958	-	EIF4G2.aAug05	2051	403	271	215	699	398	24	14	13	41	7	0.0595533	0.0516605	0.0604651	0.0586552	0.0175879	0.247922	0.24021	0.208374	0.243888	0.236587	0.0709414	0.137433
tumor	F11R	1	157820776	157820689	-	F11R.gAug05	398	152	258	215	197	413	12	20	12	11	7	0.0789474	0.0775194	0.055814	0.0558376	0.0169492	0.285067	0.276943	0.271933	0.195792	0.195875	0.0594566	0.136335
tumor	RNF130	5	179323077	179315275	-	RNF130.aAug05	1652	78	47	92	129	70	12	11	22	20	3	0.153846	0.234043	0.23913	0.155039	0.0428571	0.824915	0.186499	0.283717	0.289885	0.187945	0.0519534	0.134546
tumor	SSR2	1	152802877	152801232	-	SSR2.aAug05	315	131	157	94	198	118	14	22	12	18	3	0.10687	0.140127	0.12766	0.0909091	0.0254237	0.49099	0.217663	0.285398	0.260004	0.185155	0.0517805	0.133374
tumor	pleyda	Y	2616246	2637280	+	pleyda.aAug05	132	447	677	613	464	1129	8	12	6	6	2	0.0178971	0.0177253	0.00978793	0.012931	0.00177148	0.0601128	0.297725	0.294867	0.162826	0.215113	0.0294693	0.133357
tumor	GTF2I.1	7	72062155	72063254	+	GTF2I.1.aAug05	2362	151	158	123	202	276	7	8	6	16	4	0.0463576	0.0506329	0.0487805	0.0792079	0.0144928	0.239472	0.193583	0.211436	0.2037	0.330761	0.0605197	0.133063
tumor	CTSL	9	87574204	87574850	+	CTSL.aAug05	801	163	74	150	78	51	33	14	42	14	3	0.202454	0.189189	0.28	0.179487	0.0588235	0.909954	0.222488	0.207911	0.307708	0.197249	0.0646445	0.132604
tumor	CAST	5	96115621	96116118	+	CAST.aAug05	1790	166	125	161	285	271	8	9	9	13	4	0.0481928	0.072	0.0559006	0.045614	0.0147601	0.236468	0.203803	0.304481	0.236399	0.192898	0.0624193	0.130478
tumor	PSMB8	6	32917889	32917490	-	PSMB8.aAug05	816	99	70	77	29	40	25	21	17	8	3	0.252525	0.3	0.220779	0.275862	0.075	1.12417	0.224633	0.266864	0.196394	0.245393	0.0667161	0.129678
tumor	IGFBP2	2	217324194	217350786	+	IGFBP2.aAug05	572	58	25	35	52	67	13	8	10	13	5	0.224138	0.32	0.285714	0.25	0.0746269	1.15448	0.194146	0.277181	0.247483	0.216548	0.0646412	0.129505
tumor	NDUFS2	1	157996784	157997019	+	NDUFS2.bAug05	1803	108	125	97	113	60	14	12	13	6	0	0.12963	0.096	0.134021	0.0530973	0	0.412748	0.314065	0.232588	0.324704	0.128644	0	0.128644
tumor	GTF2IP1	7	74049585	74048488	-	GTF2IP1.aAug05	2362	151	158	123	202	276	7	7	6	16	4	0.0463576	0.0443038	0.0487805	0.0792079	0.0144928	0.233143	0.198838	0.190029	0.20923	0.33974	0.0621626	0.127866
tumor	NPDC1	9	137210646	137210356	-	NPDC1.aAug05	2381	97	106	58	47	82	15	13	11	8	3	0.154639	0.122642	0.189655	0.170213	0.0365854	0.673734	0.229526	0.182033	0.281499	0.252641	0.0543024	0.12773
tumor	NPDC1	9	137210646	137210356	-	NPDC1.aAug05	2381	97	106	58	47	82	15	13	11	8	3	0.154639	0.122642	0.189655	0.170213	0.0365854	0.673734	0.229526	0.182033	0.281499	0.252641	0.0543024	0.12773
tumor	NPIP.6	16	22442770	22446388	+	NPIP.6.aAug05	451	172	239	242	288	398	7	9	7	9	4	0.0406977	0.0376569	0.0289256	0.03125	0.0100503	0.14858	0.27391	0.253445	0.19468	0.210324	0.0676418	0.127038
tumor	KIAA1641	2	97616892	97613344	-	KIAA1641.aAug05	897	75	119	170	165	119	2	2	5	10	0	0.0266667	0.0168067	0.0294118	0.0606061	0	0.133491	0.199763	0.125901	0.220327	0.454008	0	0.125901
tumor	COX6C	8	100968894	100959669	-	COX6C.aAug05	440	193	155	112	133	61	84	75	49	54	10	0.435233	0.483871	0.4375	0.406015	0.163934	1.92655	0.225913	0.251159	0.227089	0.210747	0.0850921	0.125655
tumor	SNX6	14	34142305	34136602	-	SNX6.aAug05	582	53	39	82	55	43	11	8	15	13	3	0.207547	0.205128	0.182927	0.236364	0.0697674	0.901733	0.230165	0.227482	0.202861	0.262121	0.0773704	0.125491
tumor	C1orf43	1	150997869	150993197	-	C1orf43.aAug05	891	49	48	38	89	50	9	9	7	17	4	0.183673	0.1875	0.184211	0.191011	0.08	0.826395	0.222259	0.226889	0.222909	0.231138	0.096806	0.125453
tumor	TPM1	15	61123404	61136237	+	TPM1.aAug05	446	77	307	63	380	64	8	35	4	33	1	0.103896	0.114007	0.0634921	0.0868421	0.015625	0.383862	0.27066	0.296999	0.165403	0.226233	0.0407048	0.124699
tumor	GTF2I	7	73615844	73616943	+	GTF2I.aAug05	3286	165	187	149	240	317	7	7	6	16	4	0.0424242	0.0374332	0.0402685	0.0666667	0.0126183	0.199411	0.212748	0.187719	0.201937	0.334318	0.0632779	0.124441
tumor	SNRPB	20	2391282	2390439	-	SNRPB.dAug05	849	232	188	209	199	206	11	7	12	14	2	0.0474138	0.037234	0.0574163	0.0703518	0.00970874	0.222125	0.213456	0.167627	0.258487	0.316722	0.0437085	0.123918
tumor	ANXA7	10	74808675	74805981	-	ANXA7.aAug05	1393	88	46	64	60	93	11	8	11	9	4	0.125	0.173913	0.171875	0.15	0.0430108	0.663799	0.18831	0.261997	0.258926	0.225972	0.0647949	0.123515
tumor	RALY	20	32125102	32125286	+	RALY.bAug05	676	135	97	137	80	123	9	9	15	10	2	0.0666667	0.0927835	0.109489	0.125	0.0162602	0.410199	0.162523	0.226191	0.266917	0.30473	0.0396397	0.122883
tumor	DRAP1	11	65445019	65445377	+	DRAP1.aAug05	758	63	92	89	57	33	10	20	14	11	2	0.15873	0.217391	0.157303	0.192982	0.0606061	0.787013	0.201687	0.276223	0.199874	0.245209	0.0770077	0.122866
tumor	PARK7	1	7957201	7959650	+	PARK7.aAug05	204	80	108	67	81	74	11	8	13	6	1	0.1375	0.0740741	0.19403	0.0740741	0.0135135	0.493192	0.278796	0.150193	0.393417	0.150193	0.0274001	0.122793
tumor	C1RL	12	7135189	7133985	-	C1RL.bAug05	451	192	189	106	204	73	27	20	12	26	3	0.140625	0.10582	0.113208	0.127451	0.0410959	0.5282	0.266235	0.200341	0.214327	0.241293	0.0778037	0.122537
tumor	TPM1	15	61122195	61123279	+	TPM1.bAug05	313	77	307	63	380	64	2	15	5	22	0	0.025974	0.0488599	0.0793651	0.0578947	0	0.212094	0.122465	0.230369	0.374198	0.272968	0	0.122465
tumor	MUC1	1	151958287	151958177	-	MUC1.oAug05	398	196	298	86	149	2353	17	14	11	6	7	0.0867347	0.0469799	0.127907	0.0402685	0.00297493	0.304865	0.284502	0.154101	0.419553	0.132086	0.00975818	0.122328
tumor	KIAA1641	2	97615015	97613344	-	KIAA1641.bAug05	2105	75	119	170	165	119	6	6	13	9	2	0.08	0.0504202	0.0764706	0.0545455	0.0168067	0.278243	0.287519	0.181209	0.274834	0.196035	0.0604031	0.120806
tumor	TCIRG1	11	67574297	67574530	+	TCIRG1.aAug05	2366	103	63	83	103	119	11	7	11	15	5	0.106796	0.111111	0.13253	0.145631	0.0420168	0.538085	0.198474	0.206494	0.246299	0.270647	0.0780858	0.120389
tumor	ECH1	19	44026322	44023039	-	ECH1.aAug05	668	240	207	245	189	361	11	6	8	6	4	0.0458333	0.0289855	0.0326531	0.031746	0.0110803	0.150298	0.304949	0.192853	0.217255	0.21122	0.0737223	0.119131
tumor	NEDD8	14	23757430	23757261	-	NEDD8.nAug05	139	56	25	34	29	39	15	8	6	7	2	0.267857	0.32	0.176471	0.241379	0.0512821	1.05699	0.253415	0.302747	0.166956	0.228365	0.0485171	0.118439
tumor	BAG1	9	33251085	33249031	-	BAG1.aAug05	757	29	82	35	42	51	7	17	6	12	3	0.241379	0.207317	0.171429	0.285714	0.0588235	0.964663	0.250221	0.214911	0.177708	0.29618	0.0609783	0.11673
tumor	LOC440345	16	21766235	21762615	-	LOC440345.aAug05	1490	324	421	465	527	710	7	9	7	9	4	0.0216049	0.0213777	0.0150538	0.0170778	0.0056338	0.080748	0.26756	0.264746	0.186429	0.211495	0.0697702	0.116659
tumor	MUC1	1	151958114	151955406	-	MUC1.iAug05	910	196	298	86	149	2353	22	16	10	17	16	0.112245	0.0536913	0.116279	0.114094	0.00679983	0.403109	0.278448	0.133193	0.288456	0.283035	0.0168685	0.116324
tumor	LOC440345.7	16	30154273	30150669	-	LOC440345.7.aAug05	2429	190	252	258	362	429	7	9	7	9	4	0.0368421	0.0357143	0.0271318	0.0248619	0.00932401	0.133874	0.2752	0.266775	0.202666	0.185711	0.0696476	0.116063
tumor	ECH1	19	44020074	44019959	-	ECH1.aAug05	1514	240	207	245	189	361	13	10	10	10	6	0.0541667	0.0483092	0.0408163	0.0529101	0.0166205	0.212823	0.254515	0.226993	0.191786	0.248611	0.0780955	0.11369
tumor	COL3A1	2	189678875	189679628	+	COL3A1.aAug05	807	1308	388	1032	1793	286	3	2	4	16	0	0.00229358	0.00515464	0.00387597	0.00892359	0	0.0202478	0.113276	0.254578	0.191427	0.44072	0	0.113276
tumor	LOC23117	16	21333779	21330163	-	LOC23117.aAug05	3414	307	438	482	497	709	7	9	7	9	4	0.0228013	0.0205479	0.0145228	0.0181087	0.00564175	0.0816225	0.279351	0.251744	0.177927	0.221859	0.06912	0.108807
